# Supplementary material
Source: HighWire-hosted journal article supplement (https://erj.ersjournals.com/highwire/filestream/113344/field_highwire_adjunct_files/0/Supplementary_Materials.pdf)
Supplement: Supplementary_Materials.pdf [file Supplementary_Materials.pdf]

# A new class of bronchodilator improves lung function in COPD: A trial with GSK961081

**Pascal L.M.L. Wielders<sup>1</sup>, Andrea Ludwig-Sengpiel<sup>2</sup>, Nicholas Locantore<sup>3</sup>, Suus Baggen<sup>4</sup>, Robert Chan<sup>5</sup> and John H. Riley<sup>5</sup>**

<sup>1</sup>Dept. of Pulmonary Diseases, Catharina Hospital, Michelangelolaan 2, 5623 EJ Eindhoven, The Netherlands. <sup>2</sup>KLB Healthresearch Luebeck, Pferdemarkt 6-8, D-23552 Luebeck, Germany, <sup>3</sup>GlaxoSmithKline, Research Triangle Park, North Carolina USA, <sup>4</sup>GlaxoSmithKline, Zeist, The Netherlands, <sup>5</sup>GlaxoSmithKline, Stockley Park West, Uxbridge, UK.

## **ONLINE SUPPLEMENT 1**

### ***Sample size assumptions***

Sample size calculations were based on the primary efficacy endpoint. A 2-sided, 5% significance level was considered acceptable for this study. A separate closed step-down testing procedure was used for the once-daily and twice-daily dosing intervals and was apportioned 2.5% for each dosing interval. Forty-two evaluable patients per active arm, and 63 evaluable placebo patients would provide greater than 90% power to detect a difference between a GSK961081 dose regimen and placebo of 150 mL, assuming a standard deviation of 200 mL. Allowing for 15% withdrawal, 425 patients (50 per active arm, 75 placebo) were planned to be randomized.

## **ONLINE SUPPLEMENT 2**

### ***Inclusion criteria continued***

Patients were excluded if they were pregnant or had a body mass index (BMI)  $\geq 35$  kg/m<sup>2</sup>.

Patients were excluded if they were previously hospitalised for an acute COPD exacerbation or pneumonia within 12 weeks of study start, had lung resection surgery, or clinically significant abnormalities on X-ray taken within the previous 6 months. Patients were excluded if they had electrocardiogram (ECG) abnormalities, a pacemaker, a current cancer malignancy liver disease, hepatitis antigens or a history of drug allergies or hypersensitivity to cholinergic, beta agonists or milk proteins. Patients could not use LAMA or LABAs alone or in combination, or had oxygen therapy greater than 12h per day, or have taken part in a pulmonary rehabilitation program within 4 weeks of the screening visit. Patients also needed to be able to withhold their rescue medication for a 4 hr period prior to spirometry testing.

### **ONLINE SUPPLEMENT 3**

#### ***Efficacy assessments continued***

Spirometry was carried out using standardised spirometry equipment (Vitalograph) from Biomedical Systems (BMS) according to American Thoracic Society (ATS) guidelines [21] at all clinic visits. Over-reading of the spirometry efforts was carried out centrally by BMS. Serial spirometry over 12 hours was carried out at on treatment days 1 and 28 at all sites. At sites which were able to accommodate patients overnight for 24h at visit 6. Subject diaries were filled in by the patients to collect rescue medicine use, any untoward medical problem, any medications used and the time of dosing for day 13 and day 27.

## **ONLINE SUPPLEMENT 4**

### ***Safety assessments***

The incidence and severity of adverse events (AEs) were collected. Vital signs, pulse rate, systolic and diastolic blood pressure were carried out at each clinic visit except the final clinic visit day 29 (Visit7) or early withdrawal. 12 lead ECGs were carried out at the screening visit, treatment days 1, 14 and 28 and for early withdrawal. ECG over reading was carried out by Biomedical Systems (BMS) a centralised vendor. Further safety assessments included clinical laboratory tests (QUEST), chemistry including glucose and potassium at visits 1, 5, 6, early withdrawal and urinalysis at screening and on day 28. Urine pregnancy tests were carried out at visits 1, 2, 7 and early withdrawal. COPD exacerbations were defined as a worsening of COPD symptoms that require treatment over and above salbutamol, including antibiotics or oral corticosteroids or hospitalisation, and severity was also collected and reported.

## ONLINE SUPPLEMENT TABLE 1

Data subset splits of the primary endpoint (LS mean change from baseline trough FEV<sub>1</sub> on day 29 compared to placebo)

|               | Reversible to salbutamol |                     | Not reversible to salbutamol |                     | Concurrent ICS use |                     | No concurrent ICS use |                     |
|---------------|--------------------------|---------------------|------------------------------|---------------------|--------------------|---------------------|-----------------------|---------------------|
|               | n                        | Difference (95% CI) | n                            | Difference (95% CI) | n                  | Difference (95% CI) | n                     | Difference (95% CI) |
| <b>SAL</b>    | 16                       | 109 (-21, 238)      | 27                           | 82 (-10, 174)       | 24                 | 21 (-79, 121)       | 19                    | 158 (40, 278)       |
| <b>100 BD</b> | 16                       | 203 (76, 330)       | 31                           | 157 (69, 245)       | 28                 | 109 (12, 205)       | 19                    | 256 (138, 374)      |
| <b>200 BD</b> | 17                       | 280 (151, 409)      | 29                           | 225 (135, 315)      | 27                 | 217 (120, 313)      | 19                    | 286 (166, 405)      |
| <b>400 BD</b> | 16                       | 290 (165, 415)      | 33                           | 237 (150, 324)      | 27                 | 227 (131, 323)      | 22                    | 293 (179, 407)      |
| <b>100 OD</b> | 13                       | 306 (172, 441)      | 32                           | 91 (3, 179)         | 29                 | 136 (40, 231)       | 16                    | 165 (39, 291)       |
| <b>400 OD</b> | 12                       | 232 (87, 378)       | 29                           | 224 (135, 313)      | 21                 | 199 (96, 302)       | 20                    | 244 (127, 362)      |
| <b>800 OD</b> | 13                       | 257 (125, 390)      | 35                           | 290 (204, 376)      | 26                 | 224 (127, 321)      | 22                    | 350 (237, 463)      |

LS mean differences are compared to placebo.

BD: twice daily; CI: confidence interval; ICS: inhaled corticosteroid; LS: least squares; OD: once daily;

SAL: salmeterol.

LS means adjusted for age, sex, smoking status, reversibility stratum, overnight site stratum, concurrent ICS use, baseline and treatment.

**ONLINE SUPPLEMENT TABLE 2**

**Trough FEV1 changes during the study.**

| <b>Trough FEV<sub>1</sub>, LS<br/>mean chg (mL)</b> | <b>Placebo</b> | <b>SAL 50<br/>BD</b> | <b>081 100<br/>BD</b> | <b>081 200<br/>BD</b> | <b>081 400<br/>BD</b> | <b>081 100<br/>OD</b> | <b>081 400<br/>OD</b> | <b>081 800<br/>OD</b> |
|-----------------------------------------------------|----------------|----------------------|-----------------------|-----------------------|-----------------------|-----------------------|-----------------------|-----------------------|
| Day 2                                               | 16             | 94                   | 155                   | 239                   | 261                   | 111                   | 162                   | 189                   |
| Day 14                                              | -6             | 45                   | 176                   | 227                   | 228                   | 93                    | 177                   | 271                   |
| Day 28                                              | -17            | 38                   | 143                   | 253                   | 230                   | 85                    | 223                   | 257                   |
| Day 29                                              | -7             | 71                   | 167                   | 243                   | 251                   | 148                   | 209                   | 270                   |

  

| <b>Trough FEV<sub>1</sub>, LS<br/>mean diffs (mL)</b> |  | <b>SAL 50<br/>BD</b> | <b>081 100<br/>BD</b> | <b>081 200<br/>BD</b> | <b>081 400<br/>BD</b> | <b>081 100<br/>OD</b> | <b>081 400<br/>OD</b> | <b>081 800<br/>OD</b> |
|-------------------------------------------------------|--|----------------------|-----------------------|-----------------------|-----------------------|-----------------------|-----------------------|-----------------------|
| Day 2                                                 |  | 78                   | 139                   | 223                   | 245                   | 96                    | 146                   | 173                   |
| Day 14                                                |  | 51                   | 182                   | 233                   | 234                   | 99                    | 183                   | 277                   |
| Day 28                                                |  | 55                   | 160                   | 270                   | 247                   | 102                   | 240                   | 274                   |
| Day 29                                                |  | 77                   | 173                   | 249                   | 258                   | 155                   | 215                   | 277                   |

BD: twice daily; FEV<sub>1</sub>: forced; LS: least squares; OD: once daily; SAL: salmeterol.
